# Supplementary material for: Controlling the microstructure of MFI zeolites with Mg(OH)2 nanocrystals to improve their catalytic performances
Source: Royal Society of Chemistry journal article supplement (doi:10.1039/c4ra08277j), 2014-12-03
Supplement: c4ra08277j1.pdf [file c4ra08277j1.pdf]

## Electronic Supplementary Information (ESI) for

### Controlling microstructure of MFI zeolites with $\text{Mg}(\text{OH})_2$ nanocrystals to improve their catalytic performances

Huijuan Wei,<sup>a</sup> Ning Zhang,<sup>a</sup> Tian Zhao,<sup>a</sup> Yangqing Liu,<sup>a</sup> Yiqiang Wen,<sup>a</sup> Xiangyu Wang<sup>\*a</sup> and Baojun Li<sup>\*ab</sup>

<sup>a</sup> Institute of Industrial Catalysis and College of Chemistry and Molecular Engineering, Zhengzhou University, 100 Science Road, Zhengzhou 450001, P R China. E-mail: xiangyuwang@zzu.edu.cn and lbjfc1@zzu.edu.cn

<sup>b</sup> Department of Chemistry, Tsinghua University, Beijing 100084, P R China. E-mail: lbjfc1@tsinghua.edu.cn

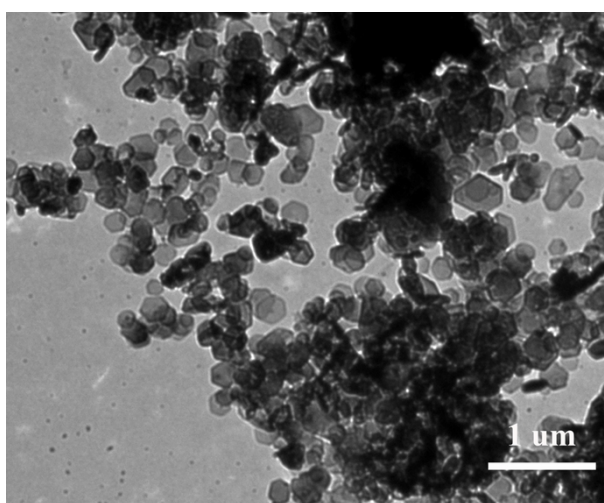

**Fig. S1** TEM images of  $\text{Mg}(\text{OH})_2$  nanocrystals.

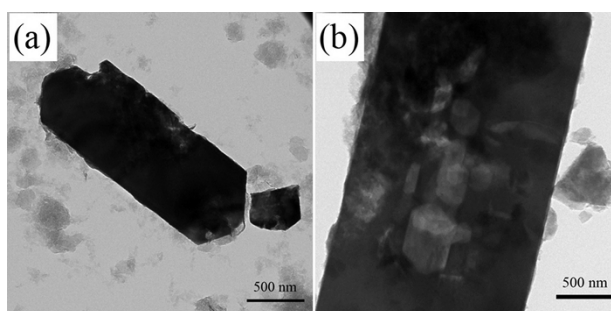

**Fig. S2** TEM images of TS-1-0.50Mg samples before and after removing  $\text{Mg}(\text{OH})_2$  (a) TS-1-0.50Mg before removing  $\text{Mg}(\text{OH})_2$  (b) TS-1-0.50Mg.

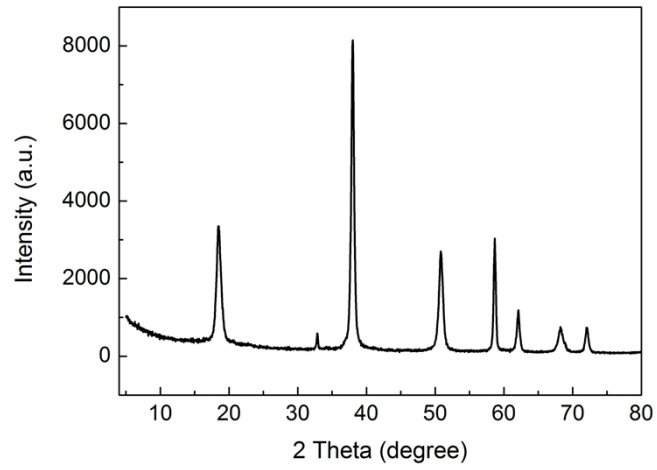

**Fig. S3** XRD pattern of  $\text{Mg}(\text{OH})_2$  nanocrystals.

**Table S1.** Chemical compositions of TS-1-xMg and S-1-xMg.

| Sample      | $n_{\text{Si}}/n_{\text{Ti}}$ (atomic) | $n_{\text{Si}}/n_{\text{Mg}}$ (atomic) |
|-------------|----------------------------------------|----------------------------------------|
| TS-1        | 51.8                                   | $\infty$                               |
| TS-1-0.05Mg | 56.4                                   | $\infty$                               |
| TS-1-0.10Mg | 70.5                                   | $\infty$                               |
| TS-1-0.30Mg | 84.6                                   | 28.4                                   |
| TS-1-0.50Mg | 73.9                                   | 32.8                                   |
| S-1         | $\infty$                               | $\infty$                               |
| S-1-0.05Mg  | $\infty$                               | $\infty$                               |
| S-1-0.10Mg  | $\infty$                               | 113.0                                  |
| S-1-0.15Mg  | $\infty$                               | 33.7                                   |
| S-1-0.25Mg  | $\infty$                               | 4.27                                   |
